# Supplementary material
Source: PubMed Central journal article supplement (PMC2646192)
Supplement: 97320630003218S1.pdf [file 97320630003218S1.pdf]

### Supplementary material

| Descriptors                                                          | Butyric acid               | CBHA                       | Depudecin                  | MS-275                     | Oxamflatin                | Phenyl butyrate           | PXD-101                  | Pyroxa-mide                | SAHA                      | SFHA                       | TSA                       | Valproic acid              |
|----------------------------------------------------------------------|----------------------------|----------------------------|----------------------------|----------------------------|---------------------------|---------------------------|--------------------------|----------------------------|---------------------------|----------------------------|---------------------------|----------------------------|
| <b>LogP</b>                                                          | 0.996                      | 0.305                      | 0.202                      | 2.03                       | 2.187                     | 2.151                     | 2.22                     | 1.396                      | 2.47                      | 3.343                      | 2.68                      | 1.68                       |
| <b>Solubility</b>                                                    | -1                         | -2.56                      | -1.98                      | -4.21                      | -5.17                     | -2.13                     | -3.61                    | -2.53                      | -3.33                     | -5.03                      | -3.26                     | -1.43                      |
| <b>Molecular weight</b>                                              | 88.106                     | 222.2                      | 212.245                    | 376.416                    | 342.376                   | 164.204                   | 318.354                  | 265.313                    | 264.325                   | 286.356                    | 302.374                   | 116.16                     |
| <b>TPSA</b>                                                          | 37.229                     | 98.652                     | 65.512                     | 106.345                    | 95.495                    | 37.299                    | 95.495                   | 91.316                     | 78.424                    | 61.353                     | 69.635                    | 37.299                     |
| <b>n Atoms</b>                                                       | 6                          | 16                         | 15                         | 28                         | 24                        | 12                        | 22                       | 19                         | 19                        | 20                         | 22                        | 8                          |
| <b>n ON</b>                                                          | 2                          | 6                          | 4                          | 7                          | 6                         | 2                         | 6                        | 6                          | 5                         | 4                          | 5                         | 2                          |
| <b>n OHNH</b>                                                        | 1                          | 4                          | 2                          | 4                          | 3                         | 1                         | 3                        | 3                          | 3                         | 3                          | 2                         | 1                          |
| <b>n Violations</b>                                                  | 0                          | 0                          | 0                          | 0                          | 0                         | 0                         | 0                        | 0                          | 0                         | 0                          | 0                         | 0                          |
| <b>n Rotatable bonds</b>                                             | 2                          | 3                          | 5                          | 7                          | 4                         | 4                         | 5                        | 6                          | 8                         | 5                          | 6                         | 3                          |
| <b>Volume</b>                                                        | 89.801                     | 190.268                    | 197.632                    | 339.353                    | 288.25                    | 161.45                    | 266.106                  | 251.487                    | 255.644                   | 252.803                    | 293.12                    | 123.19                     |
| <b>Drug score</b>                                                    | 0.18                       | 0.41                       | 0.39                       | 0.11                       | 0.28                      | 0.47                      | 0.15                     | 0.37                       | 0.35                      | 0.13                       | 0.37                      | 0.61                       |
| <b>Drug Likeness</b>                                                 | -3.94                      | -2.45                      | -3.52                      | -14.52                     | -5.31                     | -7.06                     | -7.33                    | -7.22                      | -8.87                     | -3.22                      | 1.24                      | 0.36                       |
| <b>Binding Score of HDAC 1,2,3 &amp; 8 respectively in kcal/mol.</b> | -5.73, -6.47, -6.63, -6.96 | -7.08, -7.77, -7.75, -7.82 | -5.73, -6.64, -5.91, -6.83 | -7.89, -10.5, -9.92, -8.84 | -7.23, -11.38, -8.88, Nil | -7.55, -8.56, -8.62, -9.0 | -7.50, Nil, -9.08, -7.43 | -6.44, -8.17, -7.28, -6.55 | -6.42, -9.02, -7.45, -9.0 | -8.08, -9.87, -9.7, -10.16 | -8.99, -8.58, -8.9, -9.34 | -7.04, -8.48, -8.82, -9.24 |

Table 1: Molecular descriptors value for the twelve HDACi'.
